# Supplementary material for: Determinants of health-related quality of life (HRQoL) among homeless individuals during the COVID-19 pandemic
Source: Springer Nature journal article supplement (doi:10.1007/s11136-023-03455-5), 2023-07-11

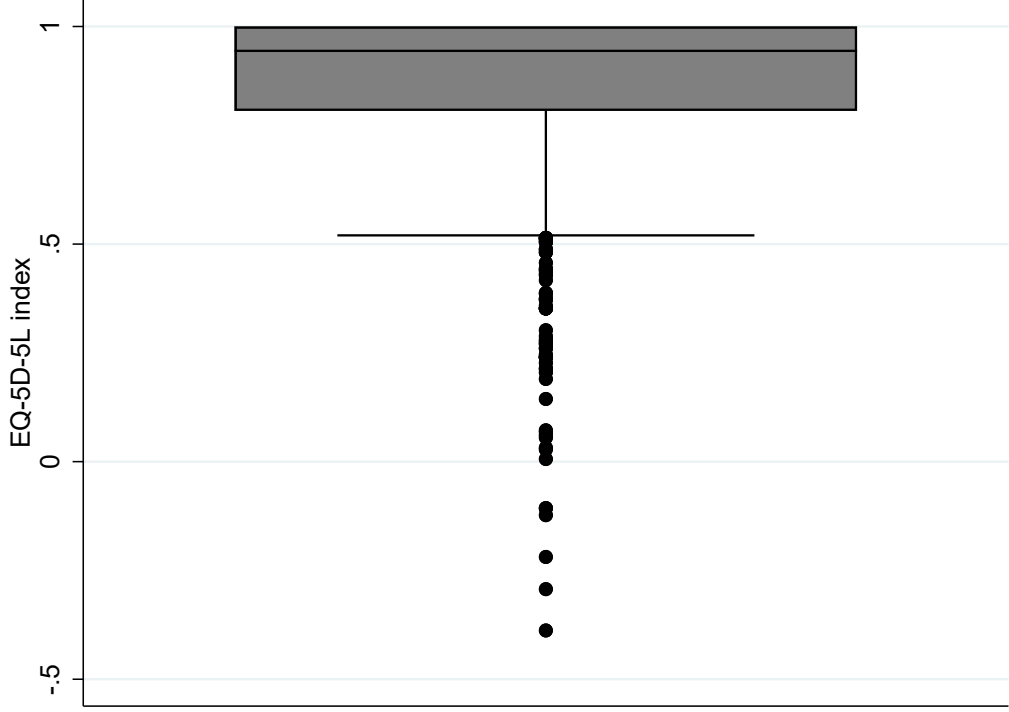

Supplement: MOESM1 [file 25605568]
